# Supplementary material
Source: PubMed Central journal article supplement (PMC3562114)
Supplement: JB.02186-12_zjb999092438so1.pdf [file JB.02186-12_zjb999092438so1.pdf]

**Table S1. Primers used in this study**

| Primer               | Sequence (5'>3')                                       |
|----------------------|--------------------------------------------------------|
| PilC1 738 F          | TACTTCCAATCCAATGCGTCTGCGCGTCCACATTTATTTATGATTAATGG     |
| PilC1 1047 R         | TTATCCACTTCCAATGCGCTATGTTTGCTCCAACAAATTACCAGCTGTTAAAGG |
| PilC2 868 F          | TACTTCCAATCCAATGCGATGTTGTTGCAATCCGTGTTCCG              |
| PilC2 end R          | TTATCCACTTCCAATGCGCTAGAAAATCTCGCGCCAAGATACACGT         |
| PilC1D930A-F         | GTGAATCGAGATGGTGTGTATGCTTTTGTCTTTGCGGGAGATTATG         |
| PilC1D930A-R         | CATAATCTCCCGCAAAGACAAAAGCATAACACACCATCTCGATTAC         |
| PilC1D930K-F         | CTTGATGTGAATCGAGATGGTGTGTATAAATTTGTCTTTGCGGGA          |
| PilC1D930K-R         | TCCCGCAAAGACAAATTTATACACACCATCTCGATTACATCAAG           |
| PilC2D1444A-F        | GTTTACCGAAGCGGCCACTTTGGTATCTGTG                        |
| PilC2D1444A-R        | CACAGATACCAAAGTGGCCGCTTCGGTAAAC                        |
| PilC2D1444K-F        | GGTAAGTTTACCGAAGCGAAGACTTTGGTATCTGTGGC                 |
| PilC2D1444K-R        | GCCACAGATACCAAAGTCTTCGCTTCGGTAAACTTACC                 |
| PilC2D1125A-F        | GACTGAAAGTGCGATGCTGTGGGAG                              |
| PilC2D1125A-R        | CTCCACAGCATCGCACTTTCAGTC                               |
| PilC2D1125K-F        | CAGACTTGACTGAAAGTAAAATGCTGTGGGAGTTTAC                  |
| PilC2D1125K-R        | GTAAACTCCACAGCATTTTACTTTTCAGTCAAGTCT                   |
| <i>pilC2</i> Δ5'F    | ATGCGAATTCAGGGTTGCCACCACCGAGC                          |
| <i>pilC2</i> Δ5'R    | ATGCGGATCCGGTTATCGCAAACCAAATCGTGC                      |
| <i>pilC2</i> Δ3'F    | ATGCGGATCCGCACTTGTGTAAAAAGCAAGTGCCG                    |
| <i>pilC2</i> Δ3'R    | ATGCAAGCTTTGTCTTCAATAGACGGACAATAGCGC                   |
| <i>aphA3</i> FBamHI  | GCATGGATCCCATCTAAATCTAGGTACTAAAACAATTCATCCAG           |
| <i>aphA3</i> RBamHI  | GCATGGATCCGTTTGACAGCTTATCATCGATAAAACCCAG               |
| <i>pilC1</i> regionF | ATGCGAATTCACGTTGGGGCAAGGCAATG                          |
| <i>pilC1</i> regionR | ATGCGTCGACATAAGCCTGATTGATTGGCTCTGCG                    |
| <i>pilC1</i> markF   | CGCCGAAAACCTGCTACGCGTGAAGAACCTGCAAAAGAG                |
| <i>pilC1</i> markR   | CTCTTTTGCAGGTTCTTACGCGTAGCAGTTTTTCGGCG                 |
| <i>ermC</i> F        | ACGTACGCGTGGTTACGCTTTGGGGAAATTATGAGG                   |
| <i>ermC</i> R        | ACGTACGCGTGAATCATGGTCATAGCTGTTTCGATAAGC                |
| <i>pilC2</i> markAF  | ATGCGAATTCCTATTGATTGCCGACAATTGGG                       |
| <i>pilC2</i> markAR  | ATGCGGATCCCCGTTTGTGTTTTTCAGCTAATCACGA                  |
| <i>pilC2</i> markBF  | ATGCGGATCCCACTTGTGTAAAAAGCAAGTGCCG                     |
| <i>pilC2</i> markBR  | ATGCAAGCTTTAATCAAATCATCAACCAACACGCC                    |

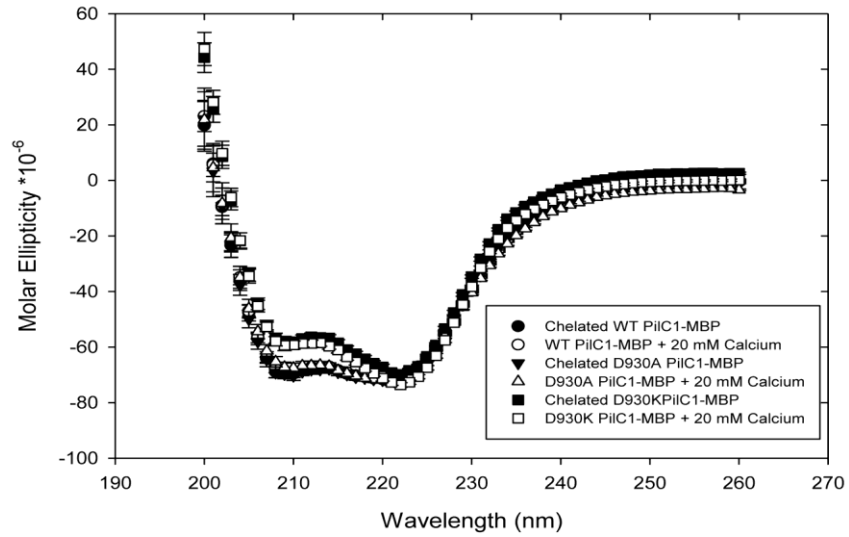

**Supplemental Figure 1. *K. kingae* PiIC1 mutations do not destabilize protein global structure.** Purified wild type PiIC1<sub>739-1047</sub>-MBP and the D930A and D930K mutants were chelated or present with a fixed amount of calcium and were examined by circular dichroism. Molar ellipticity values were calculated from wavelength scans of each protein and compared.

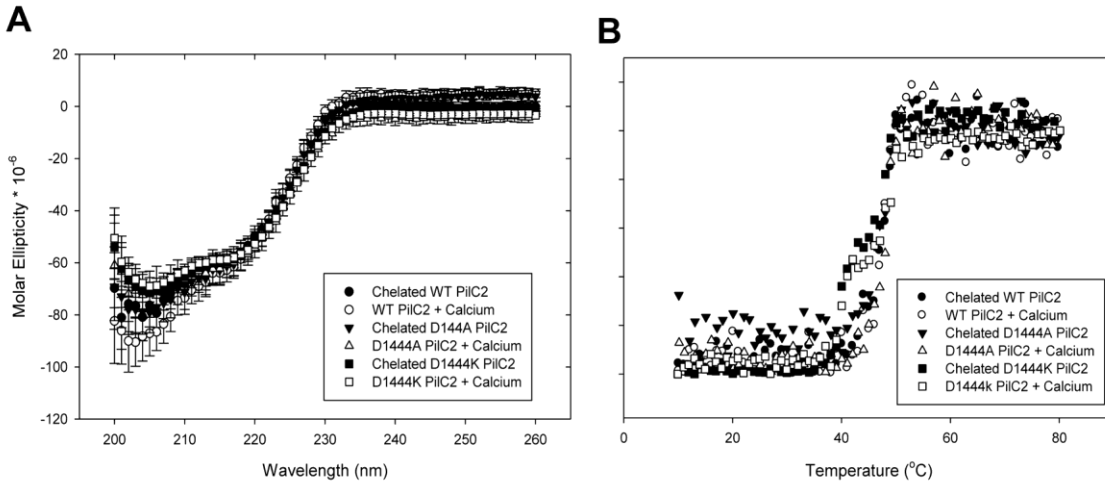

**C**

| PilC2 Protein     | T <sub>m</sub> (°C) |
|-------------------|---------------------|
| Chelated WT PilC2 | 47 ± 0.2            |
| WT PilC2+ Calcium | 47 ± 0.2            |
| Chelated D1444A   | 45 ± 0.5            |
| D1444A + Calcium  | 47 ± 0.2            |
| Chelated 1444K    | 44 ± 0.2            |
| D1444K + Calcium  | 45 ± 0.3            |

**Supplemental Figure 2. *K. kingae* PilC2 mutations do not destabilize protein global structure.** (A) Purified wild type PilC2<sub>868-1502</sub> and the D1444A and D1444K mutants where chelated or present with a fixed amount of calcium were examined by circular dichroism. Molar ellipticity values were calculated from wavelength scans of each protein and compared. (B,C) Wild type PilC2 and mutants where chelated or present with a fixed amount of calcium were observed at  $\lambda$ 214 to measure the T<sub>m</sub> of protein unfolding with (B) representing the curves and (C) representing the T<sub>m</sub> values.
